# Supplementary material for: The ancient Virus World and evolution of cells.
Source: Springer Nature journal article supplement (doi:10.1186/1745-6150-1-29), 2006-01-01

**Archaeal viruses**      **Bacteriophages**

**Archaea with plasmids, group I introns**

**Bacteria with plasmids, retons, group I & II introns**

*Escape of cells with their viruses and other parasitic elements*

**Pre-archaeal compartment**      **Pre-bacterial compartment**

**DNA World**

**RNA-DNA Retro World**

**RNA-Protein World**

**RNA World**

**inorganic compartments**

**dsDNA and RCR viruses, plasmids**

**retons, group II introns**

**positive-strand, ds RNA viruses**

**selfish ribozymes (group I Introns)**

**ocean crust**

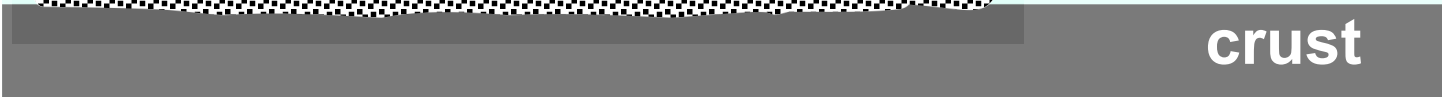

Supplement: 13062_2006_29_MOESM2_ESM.pdf [file 13062_2006_29_MOESM2_ESM.pdf]
