# Supplementary material for: The ancient Virus World and evolution of cells.
Source: Springer Nature journal article supplement (doi:10.1186/1745-6150-1-29), 2006-01-01
Supplement: 13062_2006_29_MOESM3_ESM.pdf [file 13062_2006_29_MOESM3_ESM.pdf]

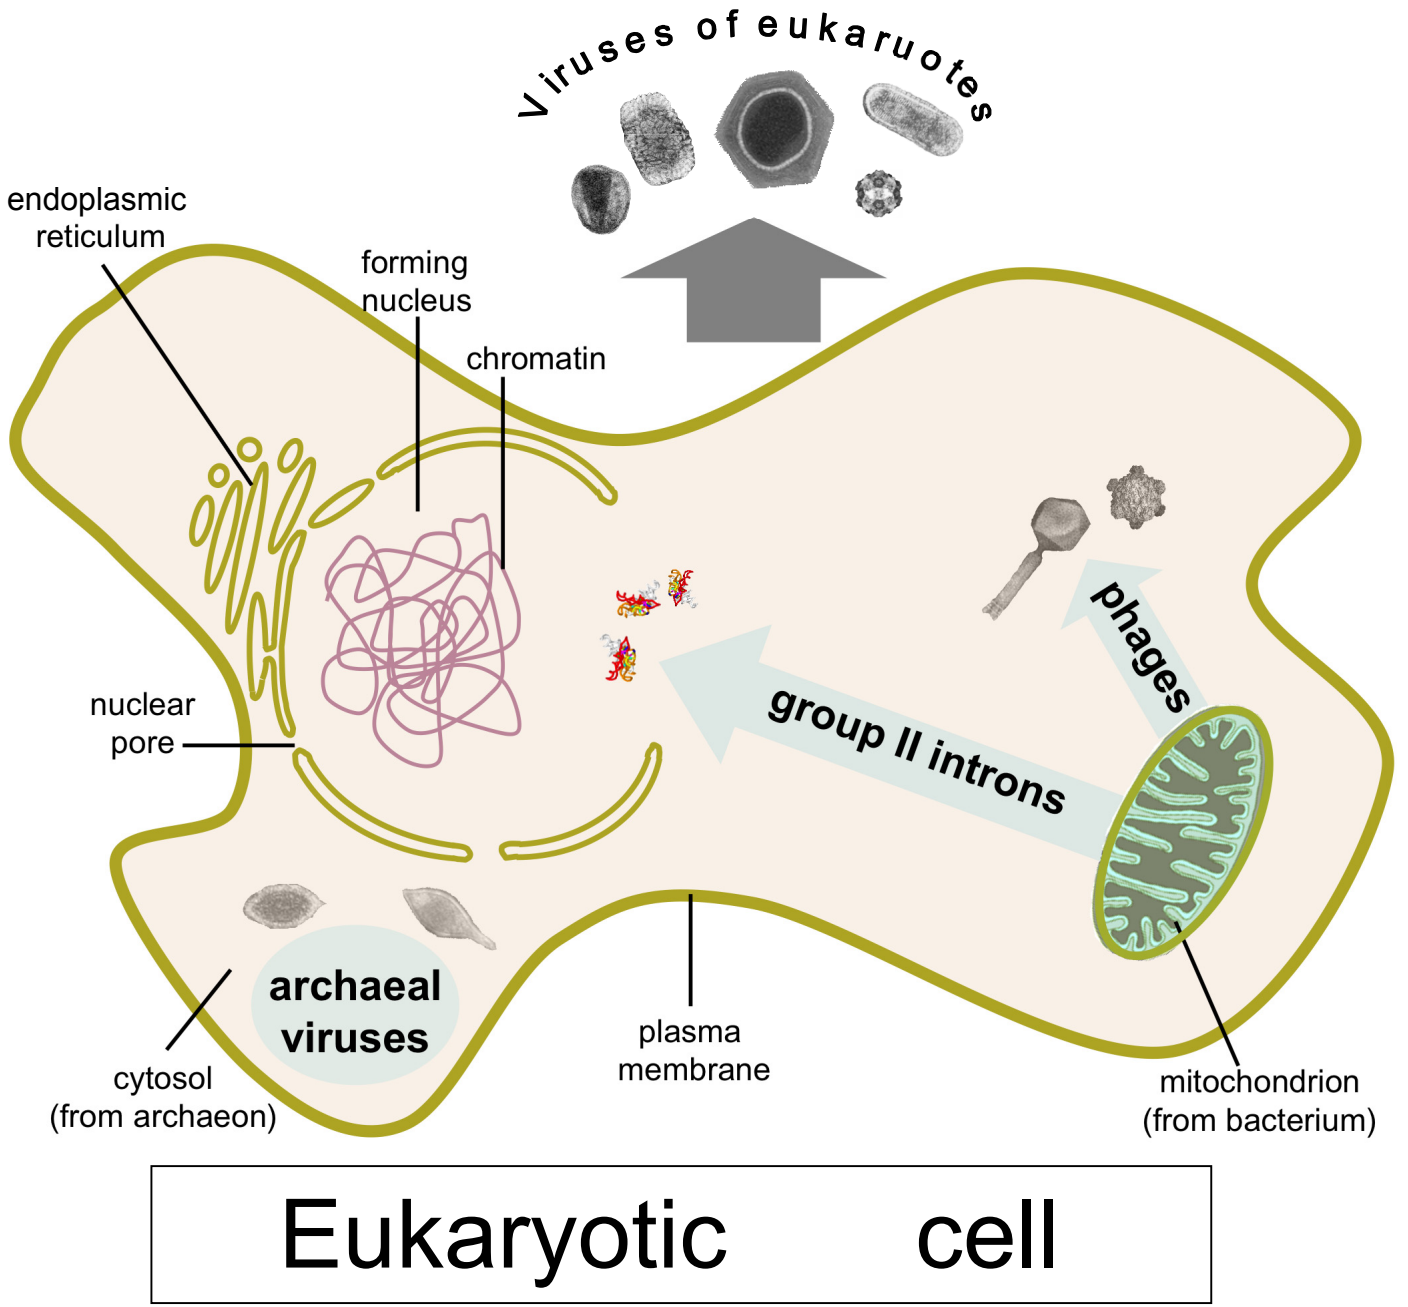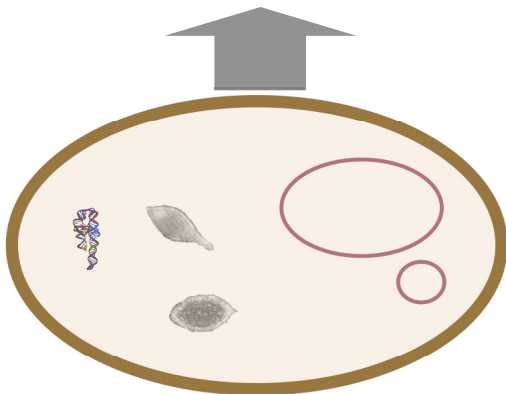

A host: Archaeon with plasmids, group I introns, and viruses

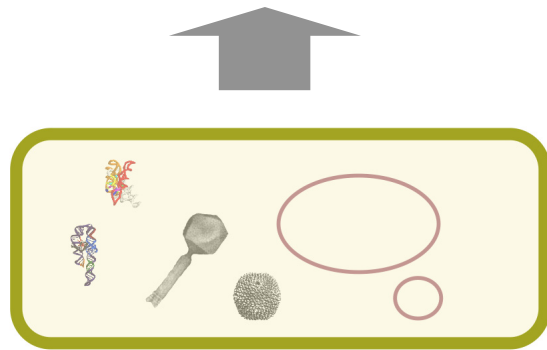

A symbiont:  $\alpha$ -Proteobacterium with plasmids, group I & II introns, retrons, and phages
