# Supplementary figures and images for: The ancient Virus World and evolution of cells.
Source: Springer Nature journal article supplement (doi:10.1186/1745-6150-1-29), 2006-01-01

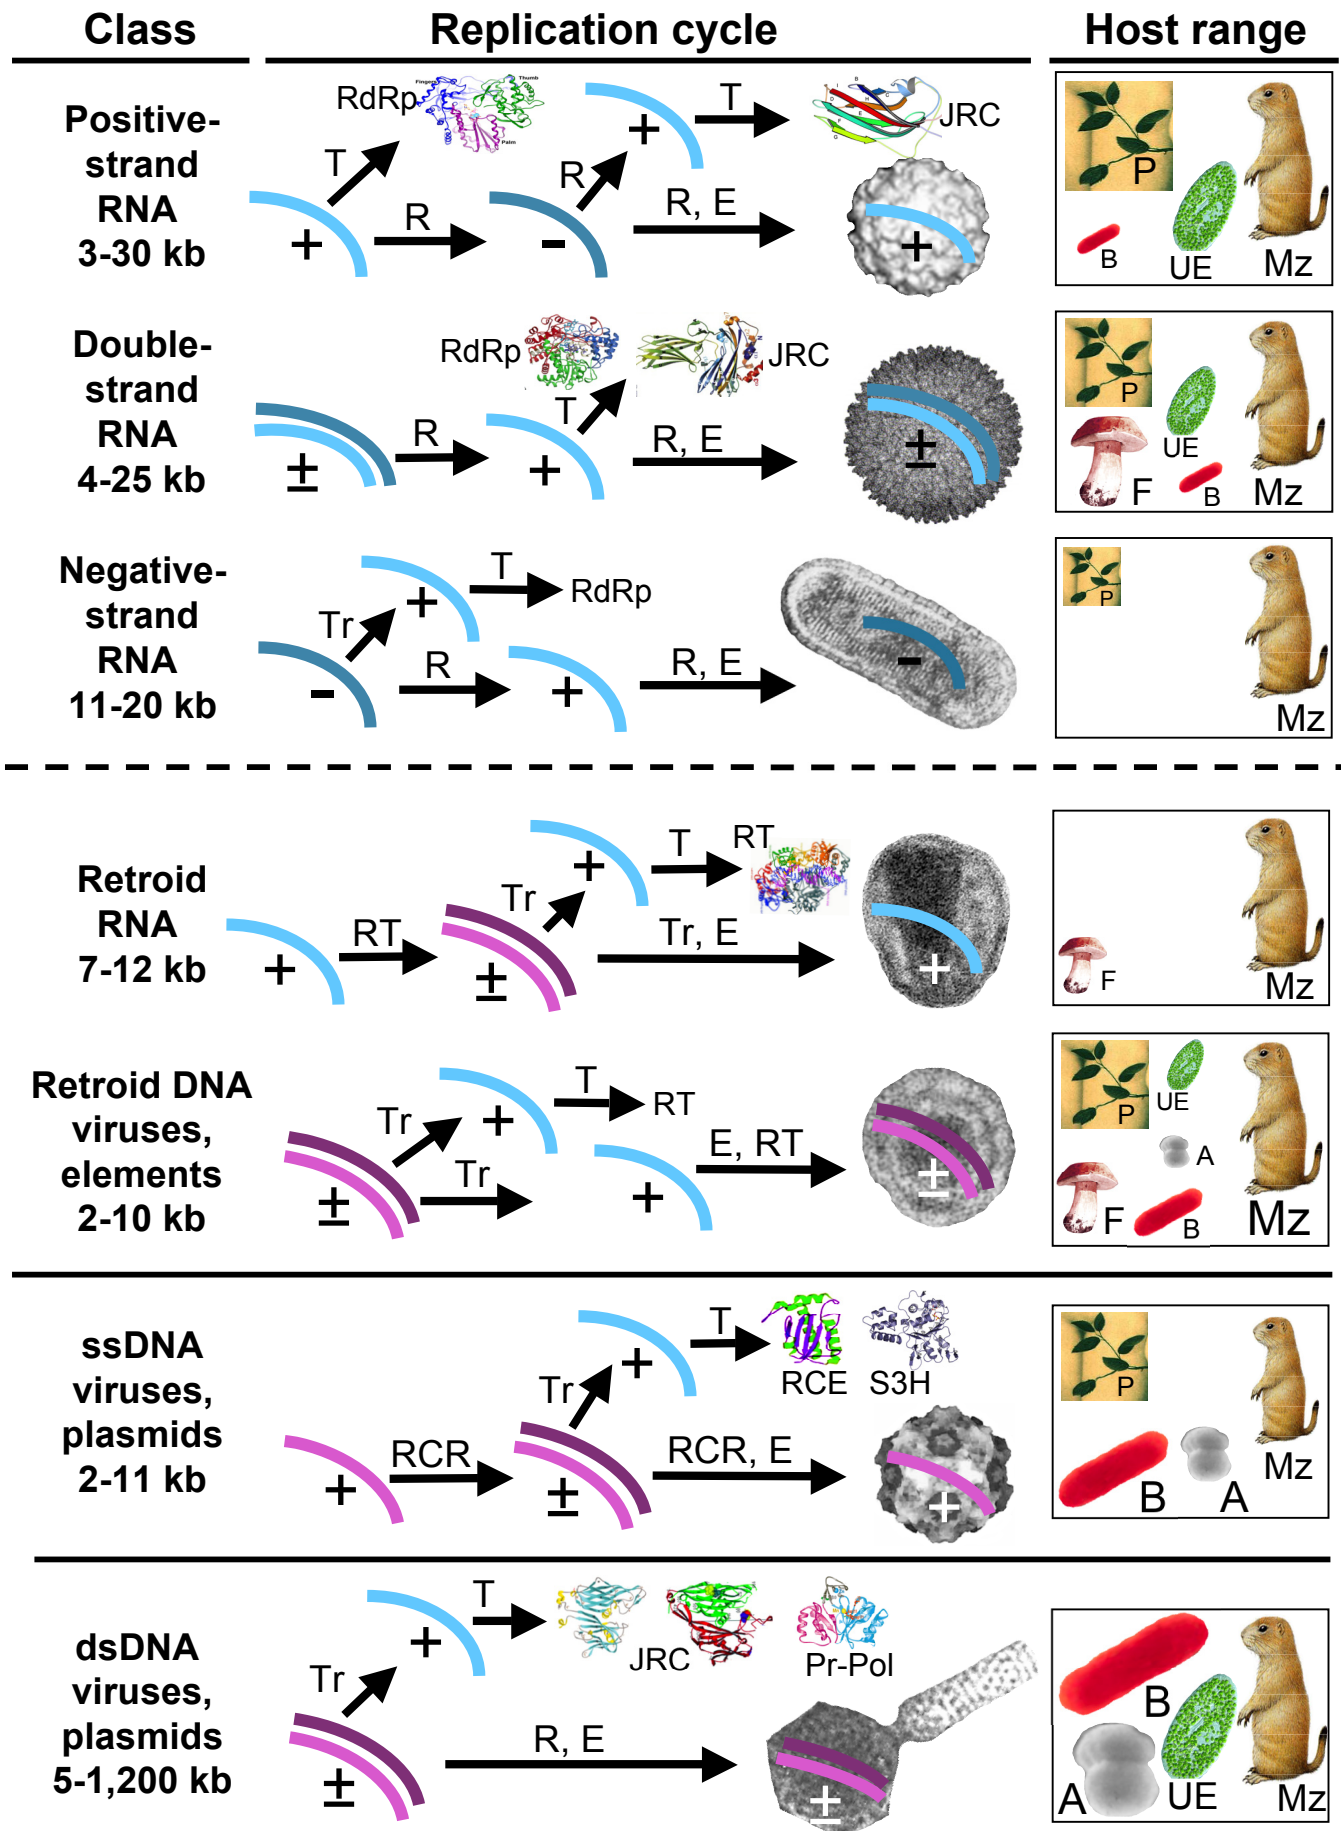

Supplement: 13062_2006_29_MOESM1_ESM.pdf [file 13062_2006_29_MOESM1_ESM.pdf]
